# Supplementary material
Source: ML conference proceedings conference paper supplement (https://proceedings.neurips.cc/paper_files/paper/2012/hash/2cfd4560539f887a5e420412b370b361-Abstract.html)
Supplement: Supplementary file 2 [file 2cfd4560539f887a5e420412b370b361-Supplemental.zip]

Archive with 1 entries (1 files):
- supplementary/Paper 1123/NIPS 1123 SI.pdf
